# Supplementary material for: CLCA4 inhibits cell proliferation and invasion of hepatocellular carcinoma by suppressing epithelial-mesenchymal transition via PI3K/AKT signaling
Source: publisher site journal article supplement (doi:10.18632/aging.101571), 2018-10-11
Supplement: Supplementary file [file aging-v10i10-101571-supplementary-material-SD1.pdf]

SUPPLEMENTARY FIGURES

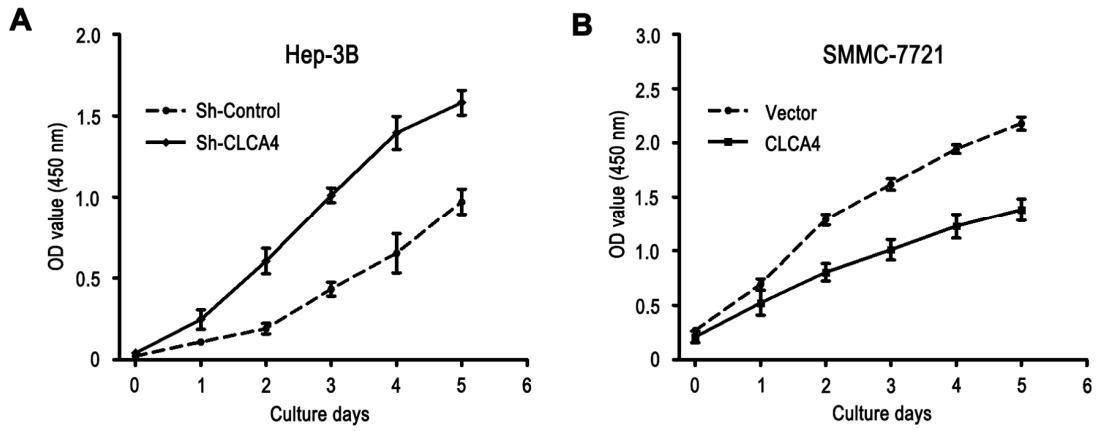

**Supplementary Figure S1. CLCA4 inhibits cell proliferation in HCC cells.** The cell viability was improved in CLCA4-silenced cells compared with the control cells (A), while the opposite effect of cell viability was observed in CLCA4-transfected cells (B).

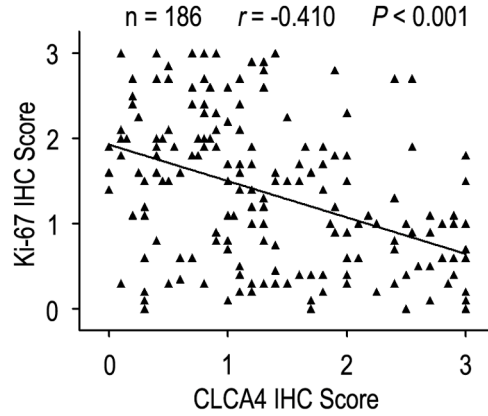

**Supplementary Figure S2. The correlation of CLCA4 and Ki-67 expression in HCC tissues.** IHC showed CLCA4 expression was negatively correlated with Ki-67 expression.
